# Supplementary material
Source: PubMed Central journal article supplement (PMC2739046)

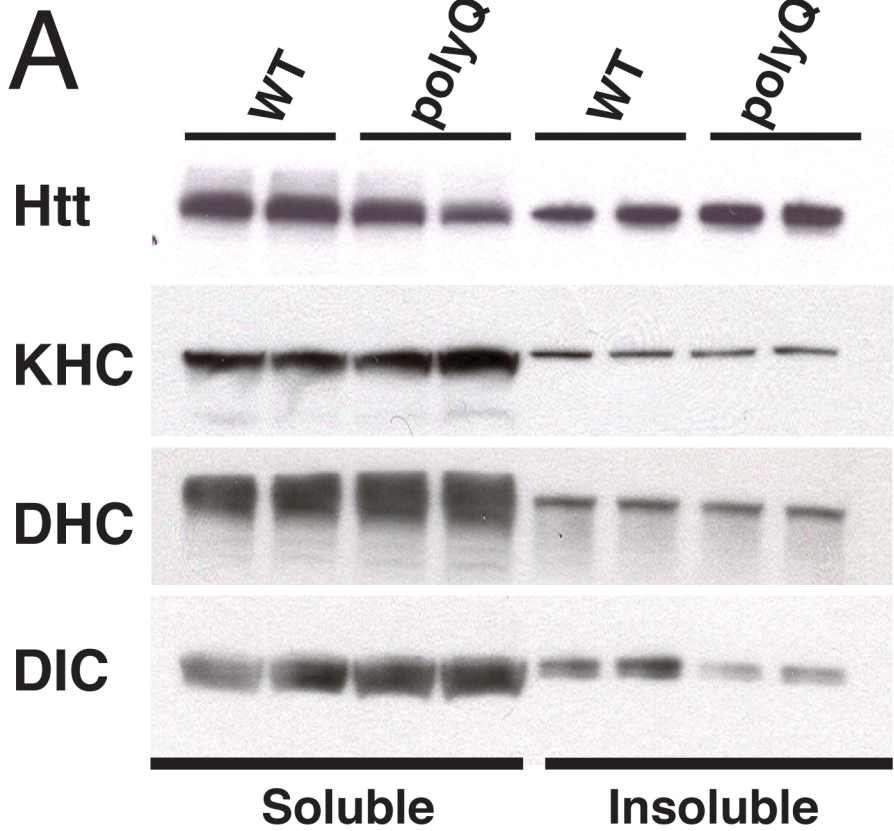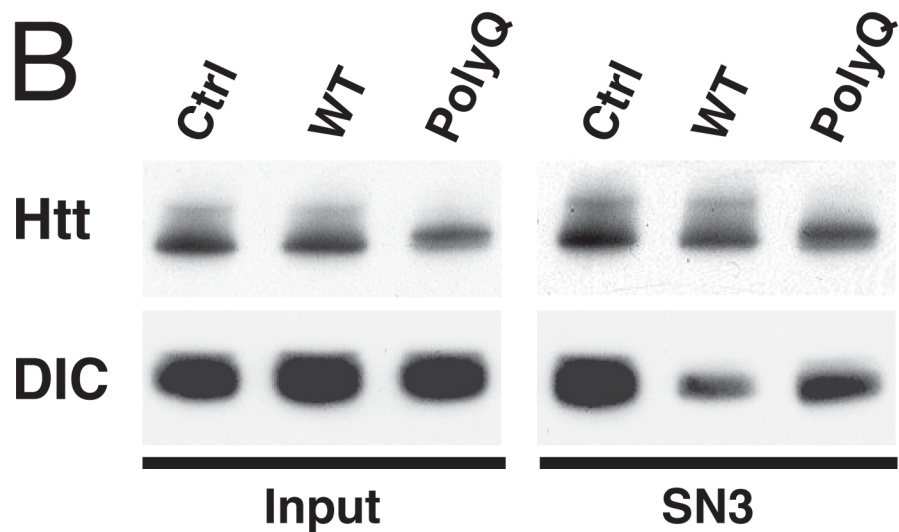

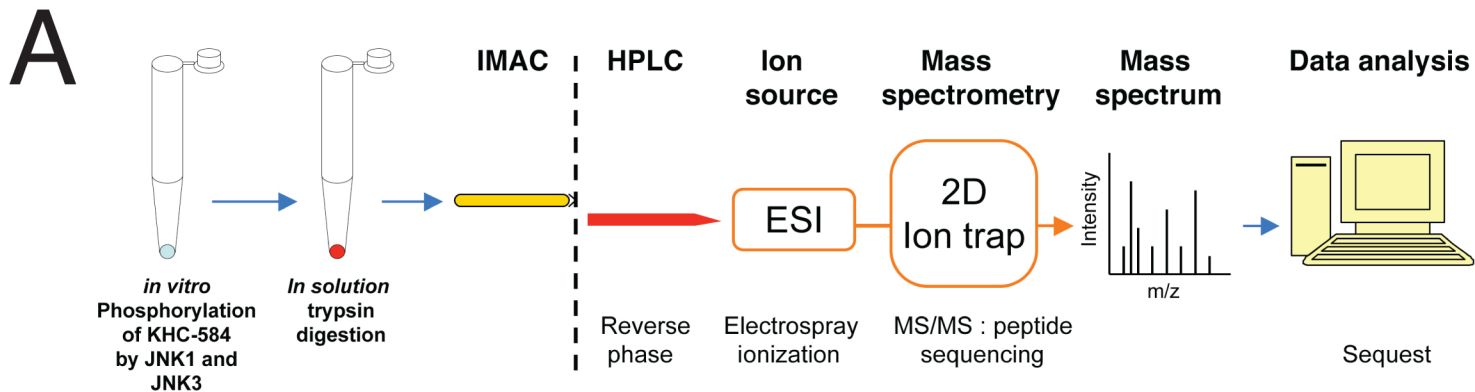

**B**

**KHC-584**

HHHHHHMADPAECSIKVMCRFRPLNEAEILRGDKFIRKFKGEETVIGQGKPYVFDRVLPPNTTQEQVYNACA  
 KQIVKDVLEGYNGTIFAYGQTSSGKTHTMEGKLHDPQLMGIIPRIAHDFDHIYSMDENLEFHIVSYFEIYLDKI  
 RDLLDVSKTNLAVHEDKNRVPYVKGCTERFVSS\*PEEVMVIDEGKANRHVAVTNMNEHSSRSHSIFLINIKQE  
 NVETEKKLSGKLYLVDLAGSEKVSKTGAEGAVLDEAKNINKSLSALGNVISALAEGTKTHVPYRDSKMTRILQD  
 SLGGNCRRTTIVICCSPSVFNEAETKSTLMFGQRAKTIKNTVSVNLELTAEWKKKYEKEKEKNKALKSVIQHLE  
 VELNRWRNGEAVPEDEQISAKDHSLEPCDNTPIIDNITPVVDGISAEKEKYDEEITSLYRQLDDKDDEINQQS  
 QLAELKQQMLDQDELLASTRRDYEKIQEELTRLQIENEAAKDEVKEVLQALEELAVNYDQKSQEVEDKTRAN  
 EQLTDELAQKTTTLTTTQRELSQLQELSNHQKRATEILNLLLKDLGEIGGIIGTNDVKTLADVNGVIEEFP

Protein coding for the first 584 aa of kinesin1-c from rat. Coverage of the 584 aa fragment is 72%

**C**

| Ion charge (a) | MH+ (ion mass) (b) | Xcorr (c) | dCn (d) | Sequence (e)         |
|----------------|--------------------|-----------|---------|----------------------|
| 2              | 1862.0 (-1.4)      | 2.8069    | 0.395   | R.FVSS*PEEVMVIDEGK.A |

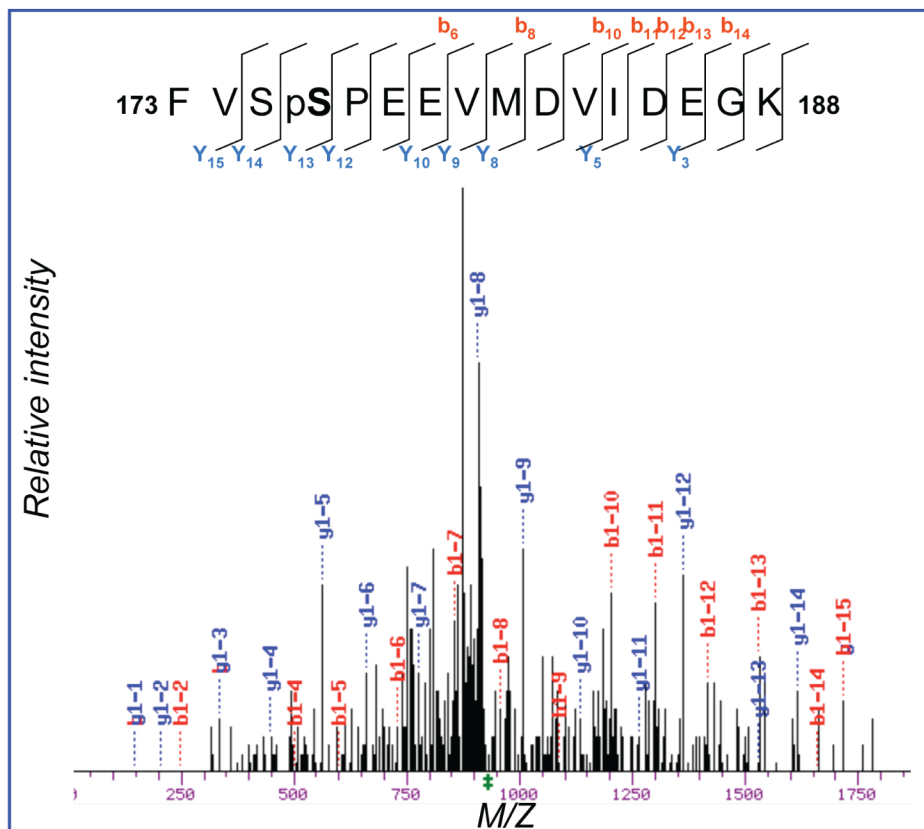

**A****JNK3: Full ms RT: 58.44**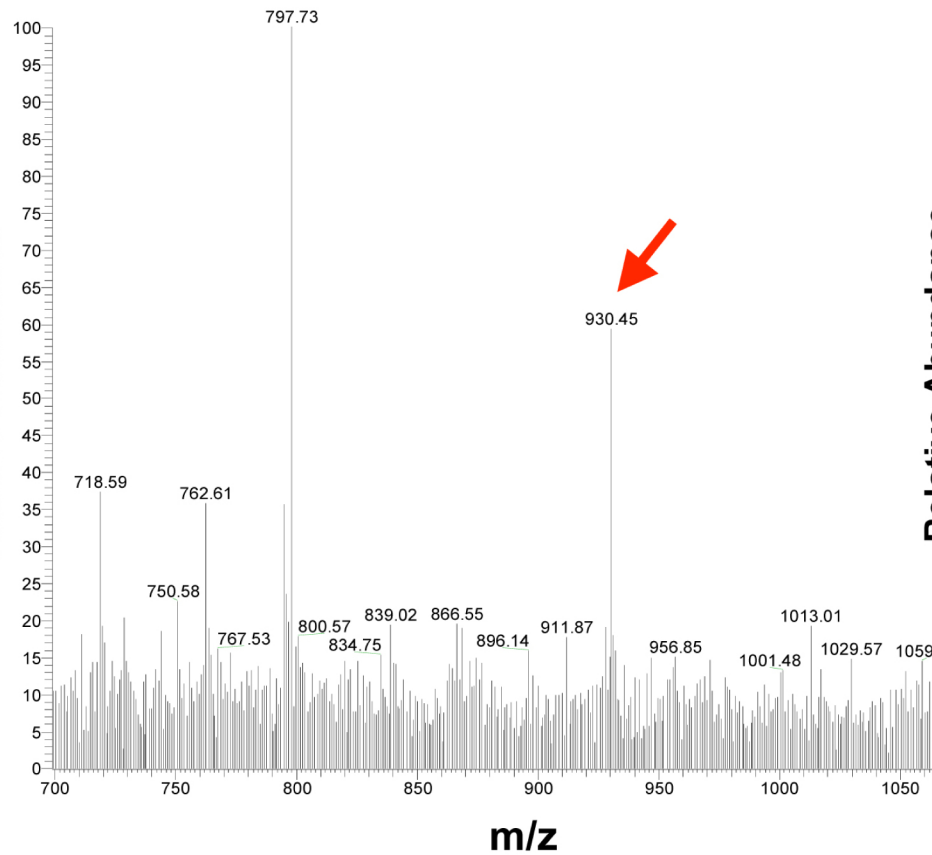**JNK1: Full ms RT: 58.44**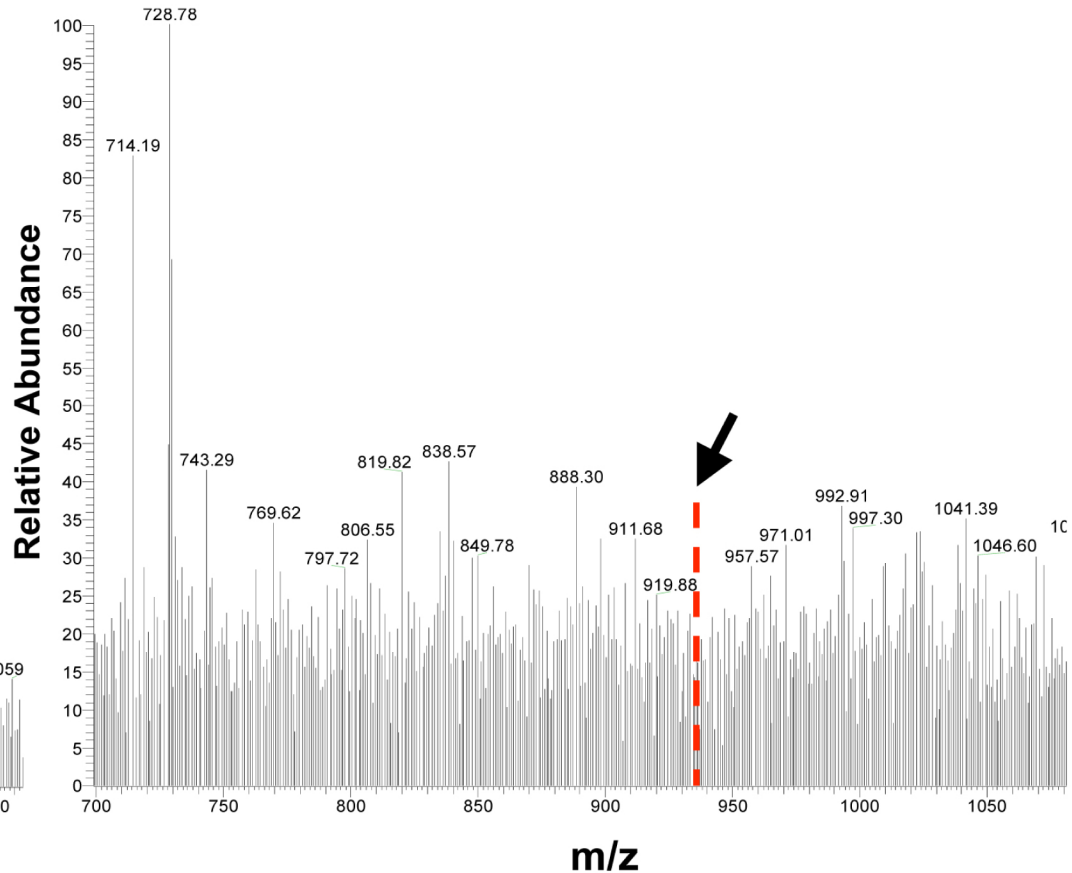

**A**

|        |                                        |
|--------|----------------------------------------|
| Homo   | 173-FVSS <sup>*</sup> PEEVMDVIDEGK-188 |
| Mus    | 173-FVSSPEEVMDVIDEGK-188               |
| Loligo | 173-FVSSPEEVMEVIDEGK-188               |

**B**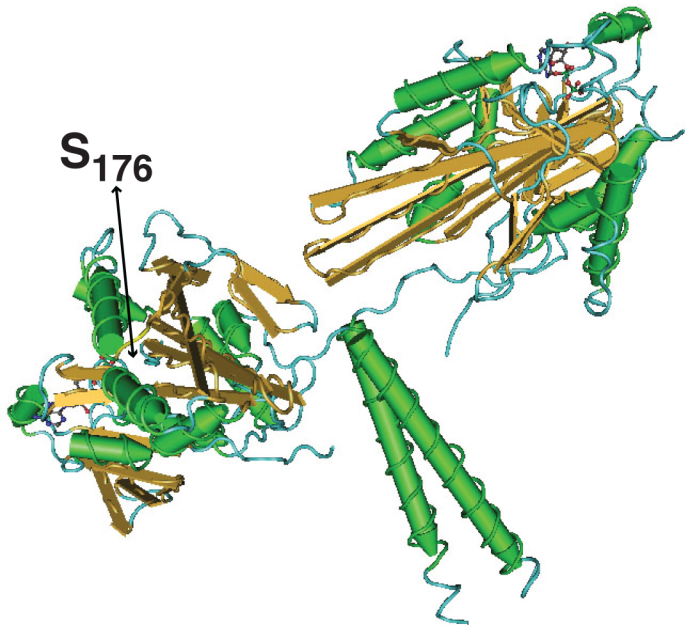

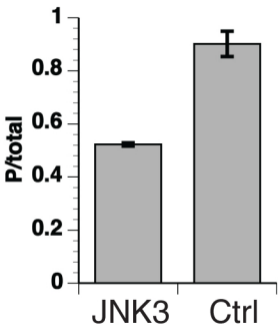

**PolyQ-Htt**

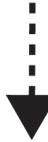

**MAPKKK**

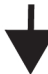

**MAPKK**

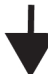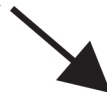

**JNK3**

**JNK1**

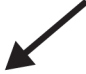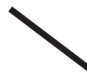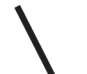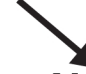

**Neurofilaments  
Others?**

**Neurofilaments  
Others?**

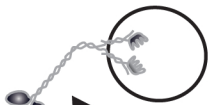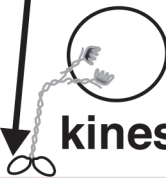

**kinesin-1**

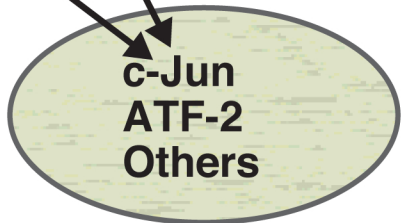

**c-Jun  
ATF-2  
Others**

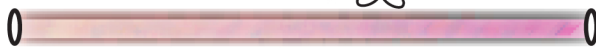

**Axonal Substrates**

**Nuclear Substrates**

**A**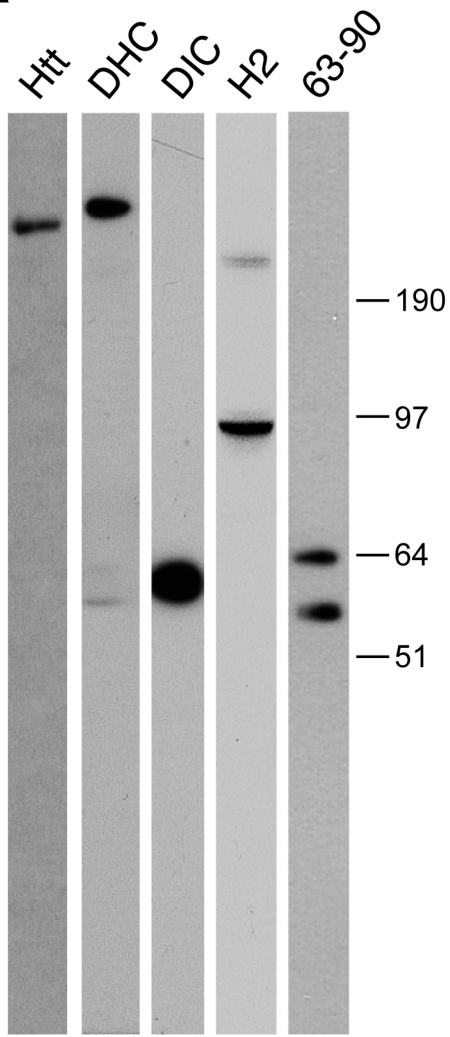**B**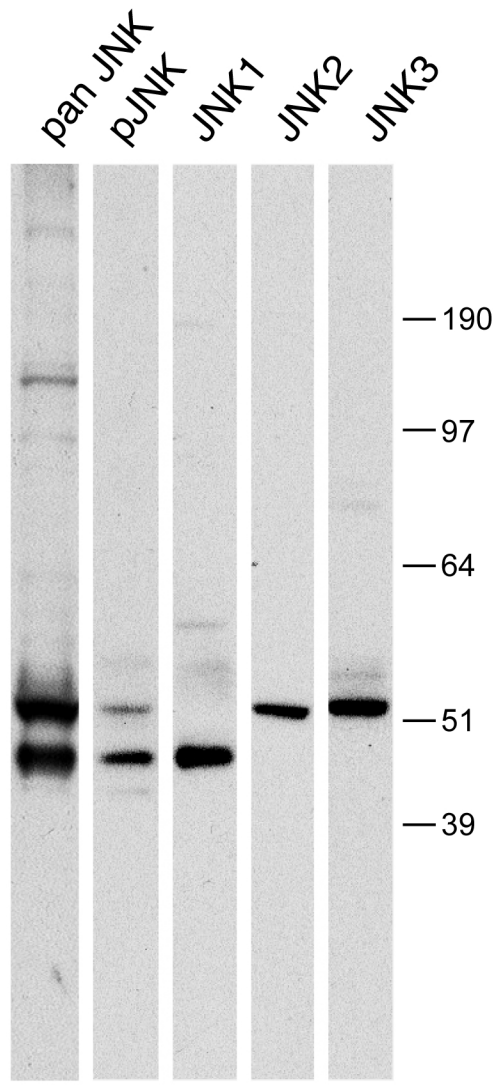**C**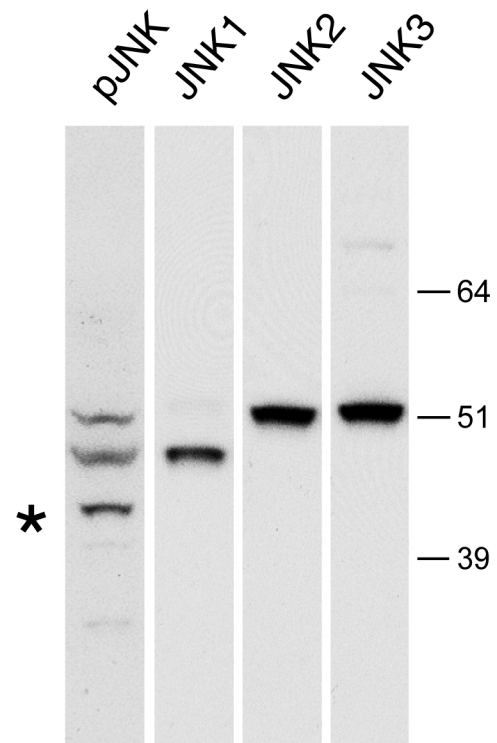

Supplement: NIHMS115377-supplement-1.pdf [file NIHMS115377-supplement-1.pdf]
