# Supplementary material
Source: PubMed Central journal article supplement (PMC2739046)

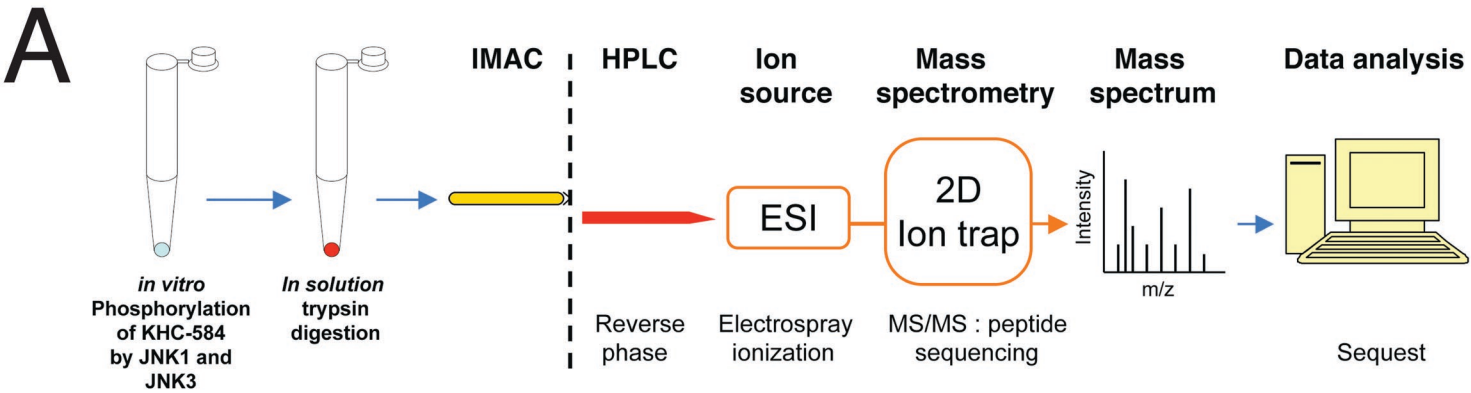

**B**

KHC-584

HHHHHHMADPAECSIKVMC**FRFRLNEAEILR**GDKFIRK**FKGEETVVIGQGKPYVFD**RVLPPNTTQEQVYNACA  
 KQIVK**DVLEGYNGTIFAYGQTSSGK**THTMEGKLHDPQLMGII**PRIAHDFDHIYSMDENLEFHIKVS**YFEIYLDKI  
 RDLLDVSKTNLAVHEDKNRPVYVKGCTER**FVSS\*PEEVMDVIDEGK**ANRHVAVTNMNEHSSRS**HSIFLINIKQE**  
 NVETEKKL**SGKLYLVDLAGSEK**VSKTGAEGAVLDEAKNINKSL**SALGNVISALAE**GTKTHVPYRDSKMTRILQD  
 SLGGNCRTTIVIC**CCSPSVFNEAETKSTLMFGQRA**KTIKNTVSVNLELTA**EEWKK**KYEKEKEKNKALKSVIQHLE  
 VELNRWR**NGEAVPEDEQISAKD**HKSLEPCDNTPIIDNITPVVDGISA**EKEYDEEITSLYRQLDDK**DDEINQQS  
 QLA**EKLKQQLDQDELLAST**RDYEKIQEELTRLQIEN**EAAKDEVKEVLQALEELAVNYDQK**SQEVEDKTRAN  
 EQLTDELAQKTTTLTTTQRELSQLQELSNH**QKRATEILNLLLKDLGEIGGI**GTNDVKTLADVNGVIEE**EF**

Protein coding for the first 584 aa of kinesin1-c from rat. Coverage of the 584 aa fragment is 72%

**C**

| Ion charge (a) | MH+ (ion mass) (b) | Xcorr (c) | dCn (d) | Sequence (e)          |
|----------------|--------------------|-----------|---------|-----------------------|
| 2              | 1862.0 (-1.4)      | 2.8069    | 0.395   | R.FVSS*PEEVMDVIDEGK.A |

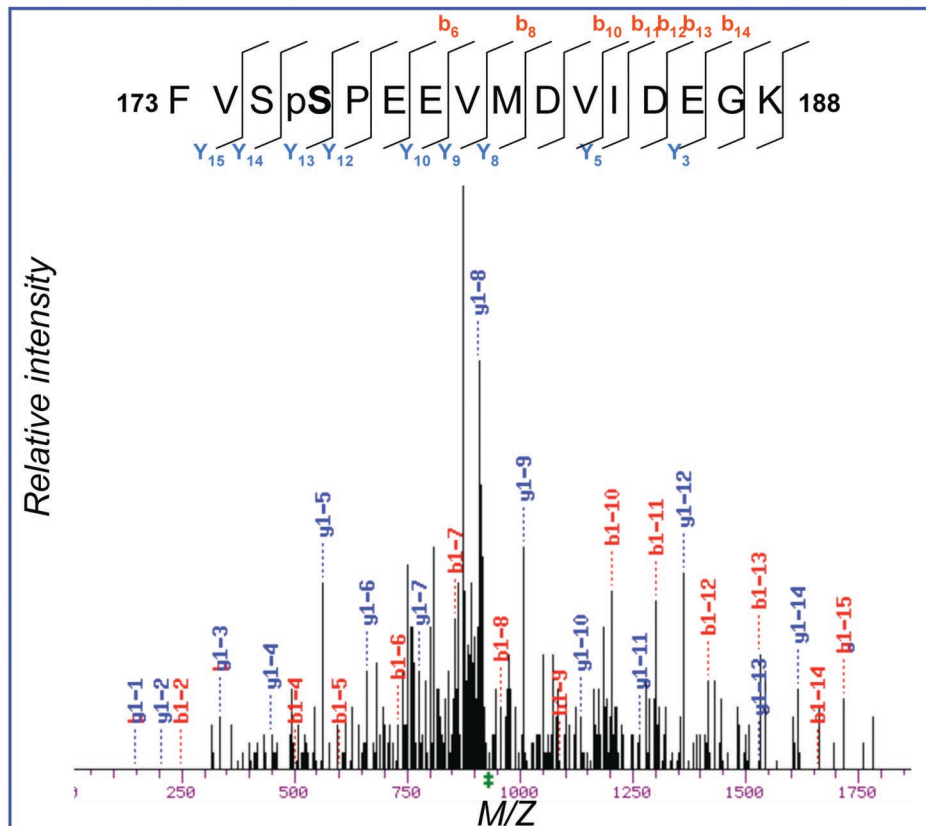

Supplement: NIHMS115377-supplement-3.pdf [file NIHMS115377-supplement-3.pdf]
