# Supplementary material
Source: PubMed Central journal article supplement (PMC2739046)
Supplement: NIHMS115377-supplement-5.pdf [file NIHMS115377-supplement-5.pdf]

**PolyQ-Htt**

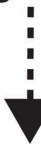

**MAPKKK**

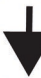

**MAPKK**

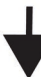

**JNK3**

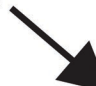

**JNK1**

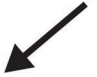

**Neurofilaments  
Others?**

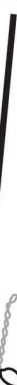

**kinesin-1**

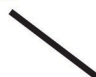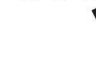

**Neurofilaments  
Others?**

**c-Jun  
ATF-2  
Others**

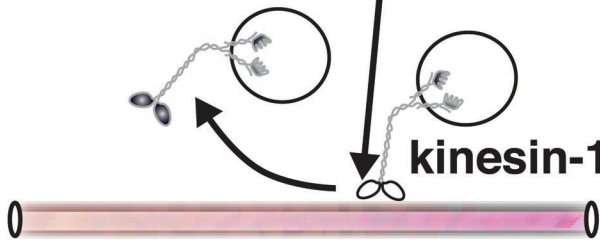

**Axonal Substrates**

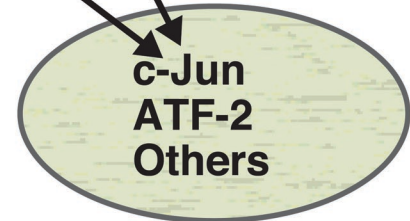

**Nuclear Substrates**
