# Supplementary material
Source: PubMed Central journal article supplement (PMC2739046)
Supplement: NIHMS115377-supplement-6.pdf [file NIHMS115377-supplement-6.pdf]

# Pathogenic Huntingtin Inhibits Fast Axonal Transport by Activating JNK3 and Phosphorylating Kinesin

Gerardo A Morfini<sup>1,2</sup>, Yi-Mei You<sup>1</sup>, Sarah L Pollema<sup>1,2</sup>, Agnieszka Kaminska<sup>1</sup>, Katherine Liu<sup>2</sup>, Katsuji Yoshioka<sup>3</sup>, Benny Björkblom<sup>4</sup>, Eleanor T. Coffey<sup>4</sup>, Carolina Bagnato<sup>5</sup>, David Han<sup>5</sup>, Chun-Fang Huang<sup>6</sup>, Gary Banker<sup>6</sup>, Gustavo Pigino<sup>1,2</sup> and Scott T. Brady<sup>1,2</sup>

<sup>1</sup>Dept. of Anatomy and Cell Biology. University of Illinois at Chicago, Chicago, IL 60612, USA.

<sup>2</sup>Marine Biological Laboratory, Woods Hole, MA 02543, USA.

<sup>3</sup>Division of Molecular Cell Signaling, Cancer Research Institute, Kanazawa University, Japan

<sup>4</sup>Turku Centre for Biotechnology, Åbo Akademi and Turku University, Turku, Finland.

<sup>5</sup>Center for Vascular Biology, University of Connecticut, Farmington, CT 06030, USA.

<sup>6</sup>The Jungers Center for Neurosciences Research, Oregon Health & Science University, Portland, OR 97239, USA

## **SUPPLEMENTAL FIGURES**

**Supplemental Figure 1. PolyQ-Htt does not affect motor protein solubility.** **A)** Brain lysates from wild type and Hdh<sup>Q109</sup> CAG knock-in mice expressing endogenous levels of normal (WT-Htt) or pathogenic Htt (polyQ-Htt) were fractionated into detergent (TX-100) soluble and insoluble fractions. The distribution of major subunits of conventional kinesin and cytoplasmic dynein subunits were analyzed by immunoblot: Kin: (kinesin-1, kinesin heavy chain), DHC (dynein heavy chain); DIC: (dynein intermediate chain), Note that while Huntingtin (Htt) protein partitions similarly in both fractions, the bulk of molecular motors was recovered in the supernatant fraction. There was no evidence of increased motor protein insolubility induced by polyQ-Htt expression. **B)** Detergent-soluble brain lysates from wild type (WT-Htt) and Hdh<sup>Q109</sup> CAG knock-in (polyQ-Htt) mice were subjected to three cycles of immunoprecipitation with antibodies against DIC, as in Fig. 1B. Aliquots of input material (Input) or the supernatant after three immunoprecipitation cycles (SN3) were analyzed by immunoblot with antibodies against DIC and Htt. Note the marked depletion of DIC immunoreactivity after immunoprecipitation with DIC-specific antibodies. Immunoprecipitates with a non-immune IgG (Ctrl) served as a control for non-specific precipitation of proteins in these experiments. In contrast, no change in Htt levels was detected, regardless of mouse genotype.

**Supplemental Figure 2. Mass spectrometry analysis of kinesin-1.** **A)** Diagram of mass spectrometry protocols for analysis of kinesin-1 phosphorylation by JNK3 and JNK1. **B)** The amino acid sequence of the KHC-584 construct is shown. Residues in red indicate amino acid coverage (72%). The sequence corresponding to the motor domain of kinesin-1c (KIF5C) is outlined. The major phosphopeptide identified in these studies (amino acids 173-188) is marked in bold. **C)** Relevant details of the 173-188 phosphopeptide identification are shown including its sequence (e), charge (a), mass (b), cross correlation (c), and delta correlation (d) values (top). Mass spectrum of the 173-188 phosphopeptide.

The graph plots ion intensity vs. mass (M) ion charge (Z) ratio for *b*+ (red) and *y*+ (blue) ions. The peptide sequence (top) shows a detail of the identified residues.

**Supplementary Figure 3. KHC560 motor domain is phosphorylated by JNK3, but not by JNK1.** KHC560 was phosphorylated *in vitro* using either JNK3 or JNK1 (as shown in Figure 7B), and samples processed for mass spectrometry analysis as described in Material and Methods. Full spectra (Full ms) corresponding to the retention time of the 173-188 phosphopeptide (RT: 58.44 minutes) are shown. The red arrow points the peak corresponding to the precursor ion of the phosphopeptide (*m/z* of 930.4). Note that this peak is present only in Full ms of JNK3-phosphorylated KHC560 samples (left), but not in Full ms of JNK1-phosphorylated KHC560 samples (right). The black arrow and dashed red line point the area of the Full ms where the peak for the precursor ion should be found. The activities of recombinant JNK1 and JNK3 were normalized using cJun as a substrate. These results indicate that JNK3, but not JNK1, can phosphorylate the serine 176 residue in kinesin-1.

**Supplemental Figure 4. Inhibition of conventional kinesin-based motility induced by pathogenic Htt (polyQ-Htt).** Our results showing increased activation and phosphorylation of JNKs induced by polyQ-Htt suggest that this mutant polypeptide activates specific MAPKKKs and MAPKKs (dashed arrow) upstream of JNK. Increased JNK1 activation is linked to alterations in the activity of various transcription factors (i.e., ATF-2 and cJun, among others), consistent with widely reported changes in gene transcription in Huntington's disease<sup>1</sup>. Activation of JNK3 on the other hand, would lead to phosphorylation of kinesin-1 and other likely other axonal substrates (question mark). Data in this work indicates that phosphorylation of kinesin-1s by JNK3 results in reduced binding of conventional kinesin to microtubules. Reductions in the delivery of critical axonal cargoes by conventional kinesin would result in impaired synaptic function and dying back degeneration of neurons<sup>2</sup>.

1. Cha, J.H. Transcriptional signatures in Huntington's disease. *Prog Neurobiol* **83**, 228-248 (2007).
2. Morfini, G., Pigino, G. & Brady, S.T. Polyglutamine Expansion Diseases: Failing to Deliver. *Trends Molec. Med.* **11**, 64-70 (2005).

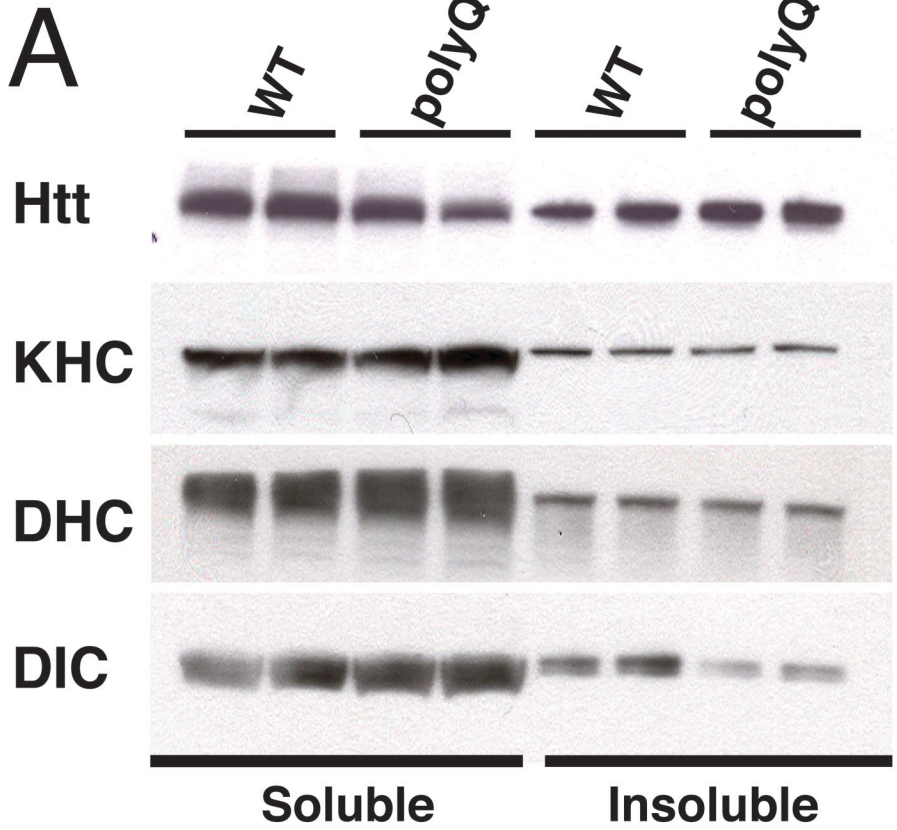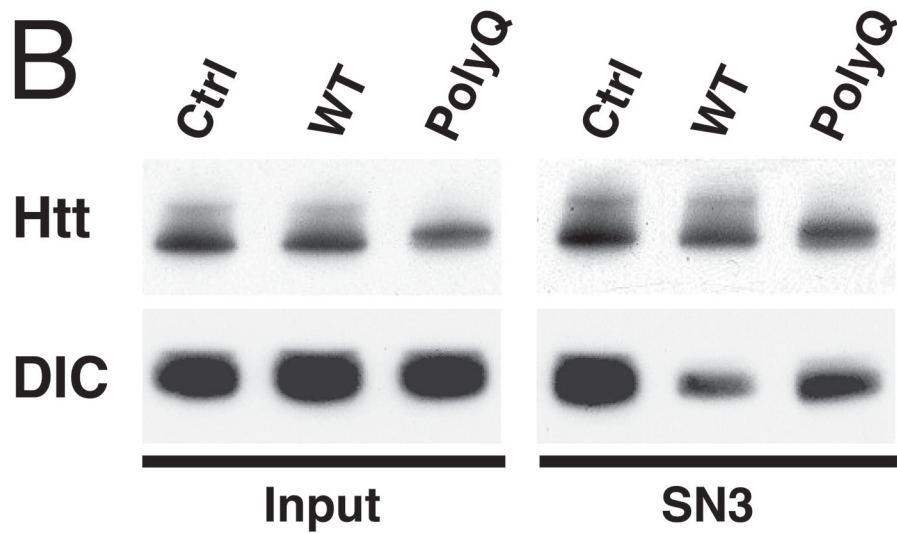

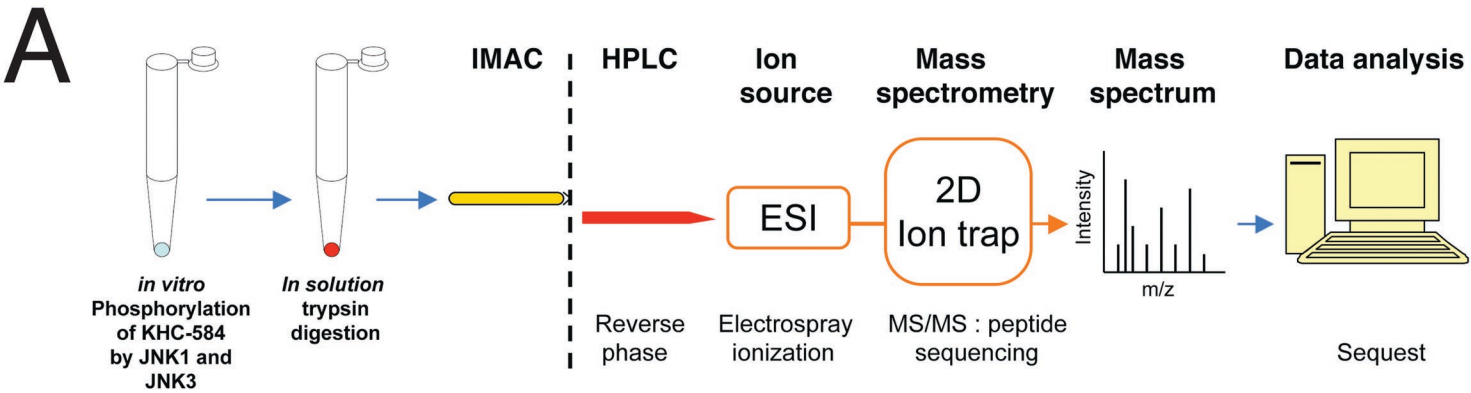

**B**

KHC-584

HHHHHHMADPAECSIKVMC**FRFRLNEAEILR**GDKFIRK**FKGEETVVIGQGKPYVFD**RVLPPNTTQEQVYNACA  
 KQIVK**DVLEGYNGTIFAYGQTSSGK**THTMEGKLHDPQLMGII**PRIAHDFDHIYSMDENLEFHIKVS**YFEIYLDKI  
 RDLLDVSKTNLAVHEDKNRPVYVKGCTER**FVSS\*PEEVMDVIDEGK**ANRHVAVTNMNEHSSRS**HSIFLINIKQE**  
 NVETEKKL**SGKLYLVDLAGSEK**VSKTGAEGAVLDEAKNINKSL**SALGNVISALAE**GTKTHVPYRDSKMTRILQD  
 SLGGNCRTTIVIC**CCSPSVFNEAETKSTLMFGQRA**KTIKNTVSVNLELTA**EEWKK**KYEKEKEKNKALKSVIQHLE  
 VELNRWR**NGEAVPEDEQISAKD**HKSLEPCDNTPIIDNITPVVDGISA**EKEYDEEITSLYRQLDDK**DDEINQQS  
 QLAELK**QQMLDQDELLAST**RDYEKIQEELTRLQIENEA**AKDEVKEVLQALEELAVNYDQK**SQEVEDKTRAN  
 EQLTDELAQKTTTLTTTQ**RELSQLQELSNH**QK**KRATEILNLLLKDLGEIGGI**GTNDVKTLADVNGVIEEEF

Protein coding for the first 584 aa of kinesin1-c from rat. Coverage of the 584 aa fragment is 72%

**C**

| Ion charge (a) | MH+ (ion mass) (b) | Xcorr (c) | dCn (d) | Sequence (e)          |
|----------------|--------------------|-----------|---------|-----------------------|
| 2              | 1862.0 (-1.4)      | 2.8069    | 0.395   | R.FVSS*PEEVMDVIDEGK.A |

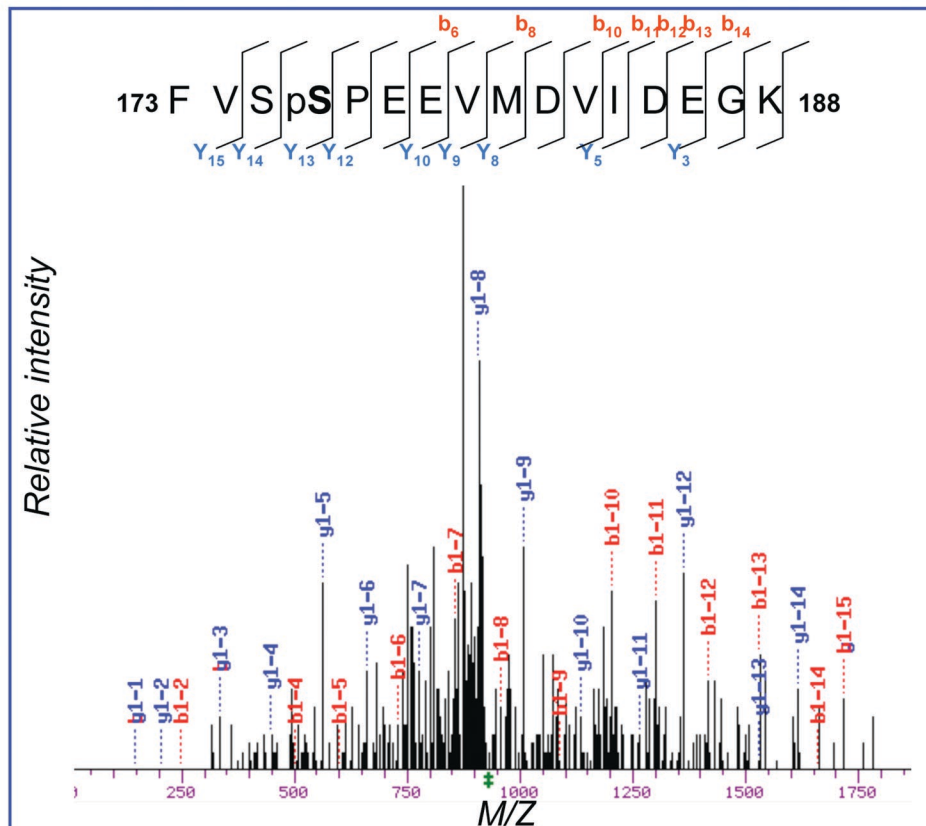

# JNK3: Full ms RT: 58.44

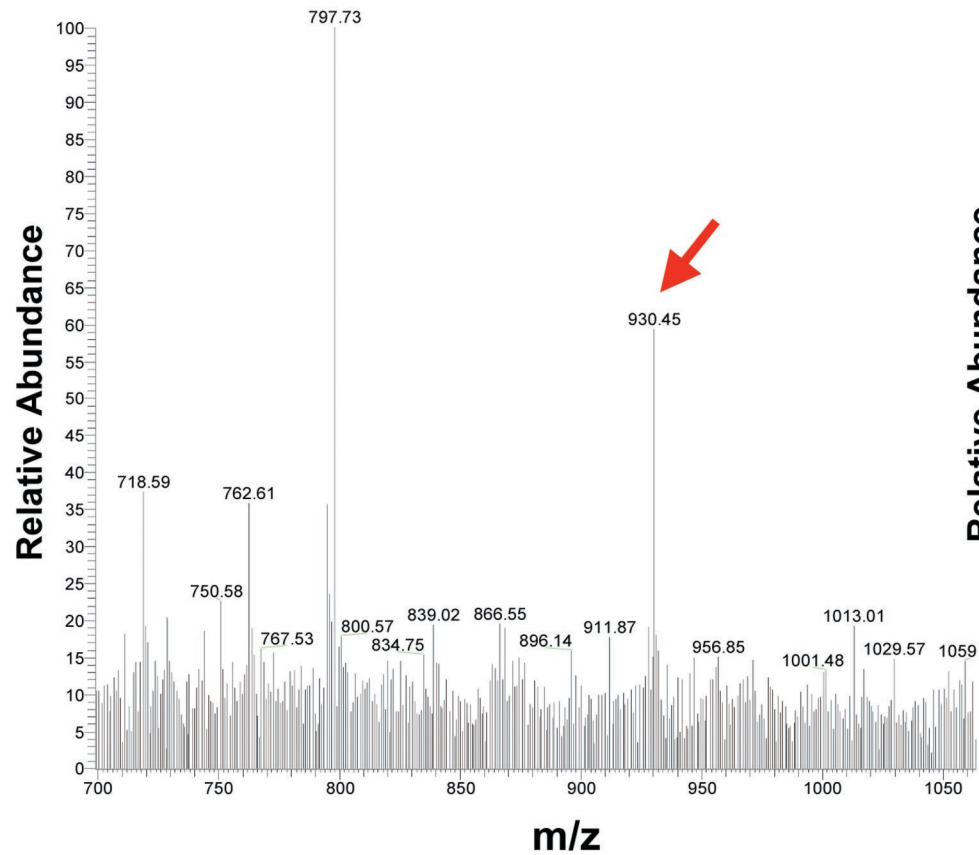

# JNK1: Full ms RT: 58.44

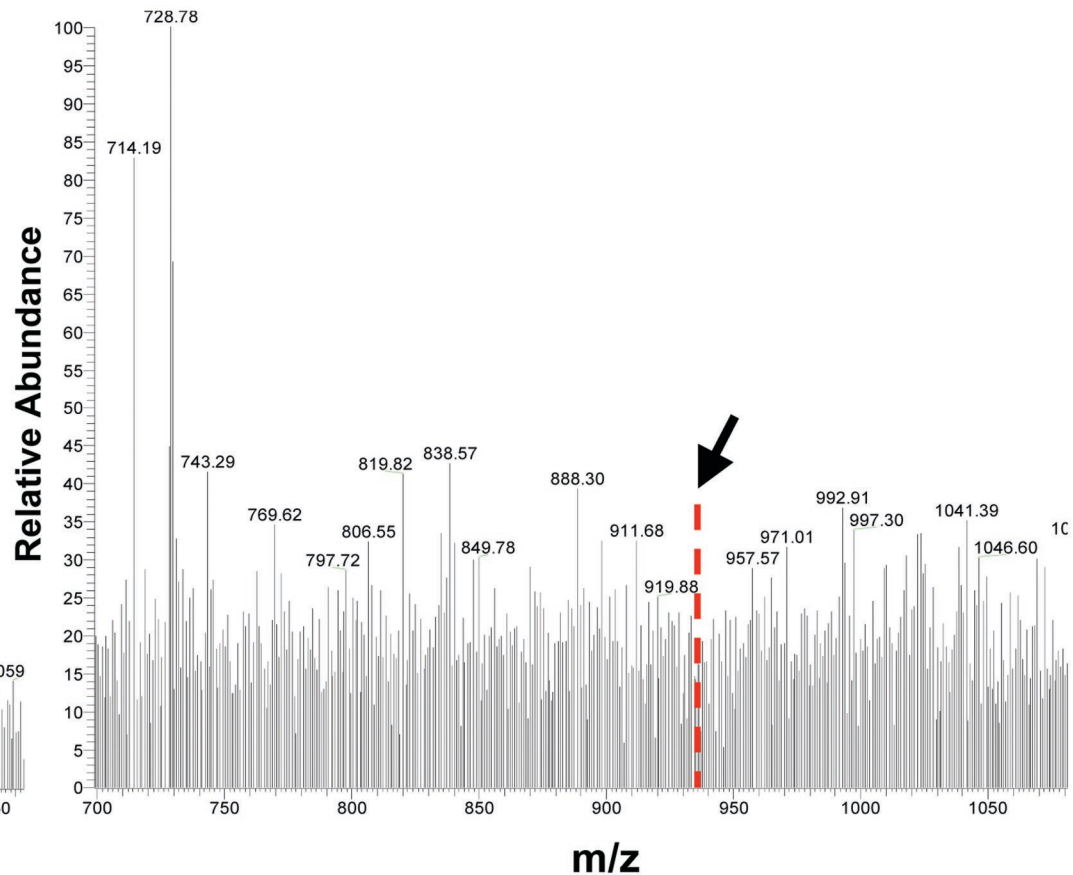

**PolyQ-Htt**

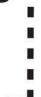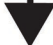

**MAPKKK**

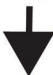

**MAPKK**

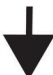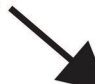

**JNK3**

**JNK1**

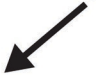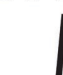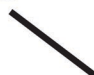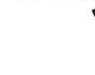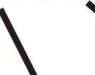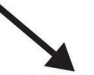

**Neurofilaments  
Others?**

**Neurofilaments  
Others?**

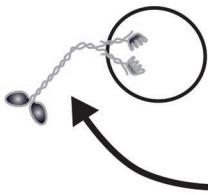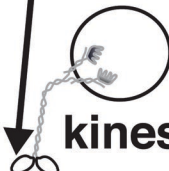

**kinesin-1**

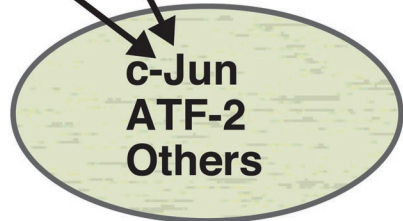

**c-Jun  
ATF-2  
Others**

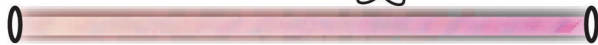

**Axonal Substrates**

**Nuclear Substrates**
