# Supplementary material
Source: PubMed Central journal article supplement (PMC2739046)

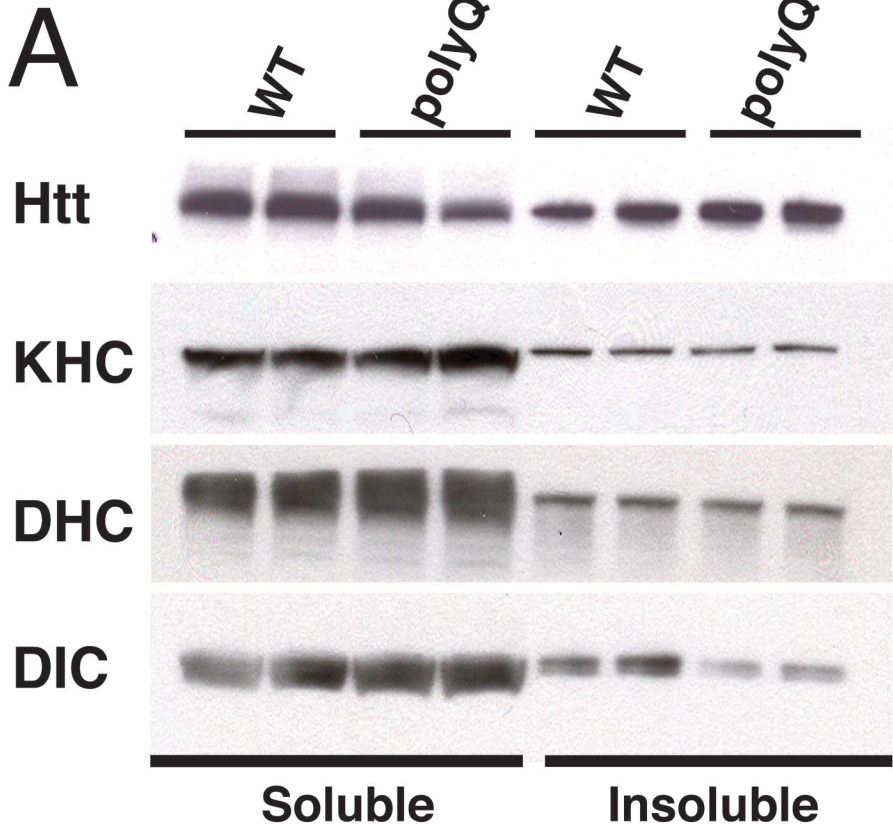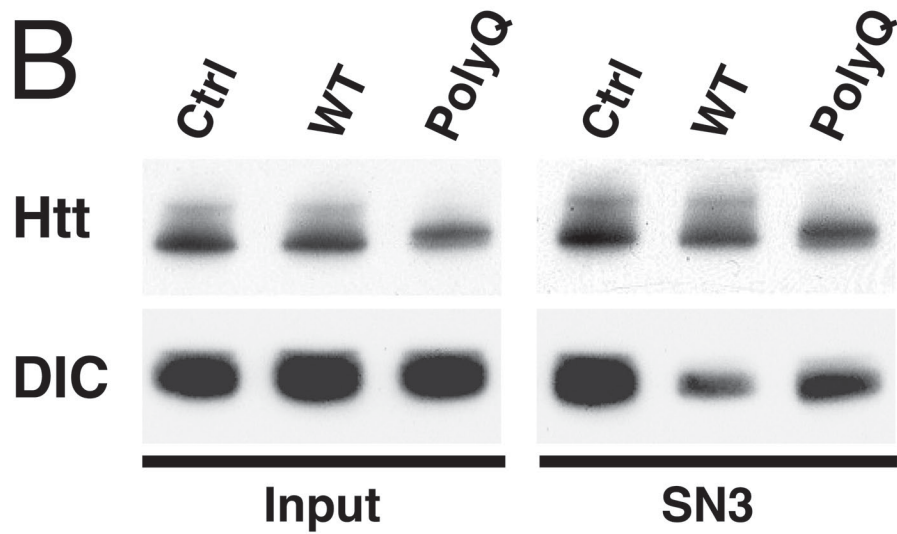

Supplement: NIHMS115377-supplement-2.pdf [file NIHMS115377-supplement-2.pdf]

# JNK3: Full ms RT: 58.44

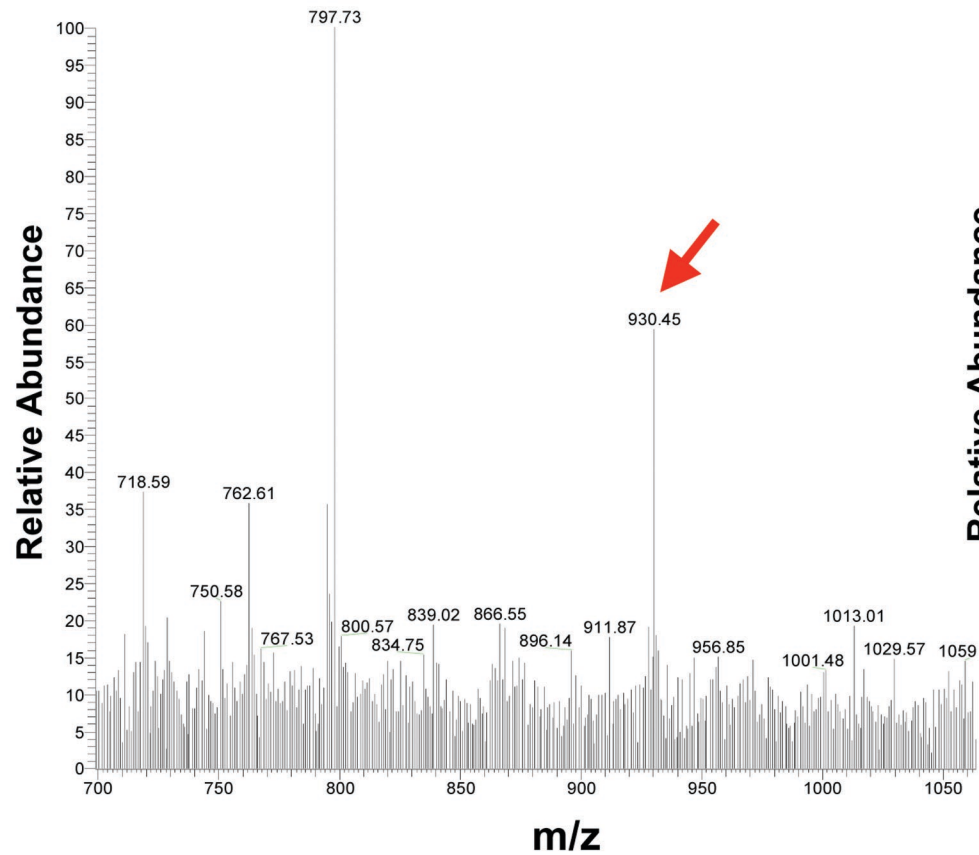

# JNK1: Full ms RT: 58.44

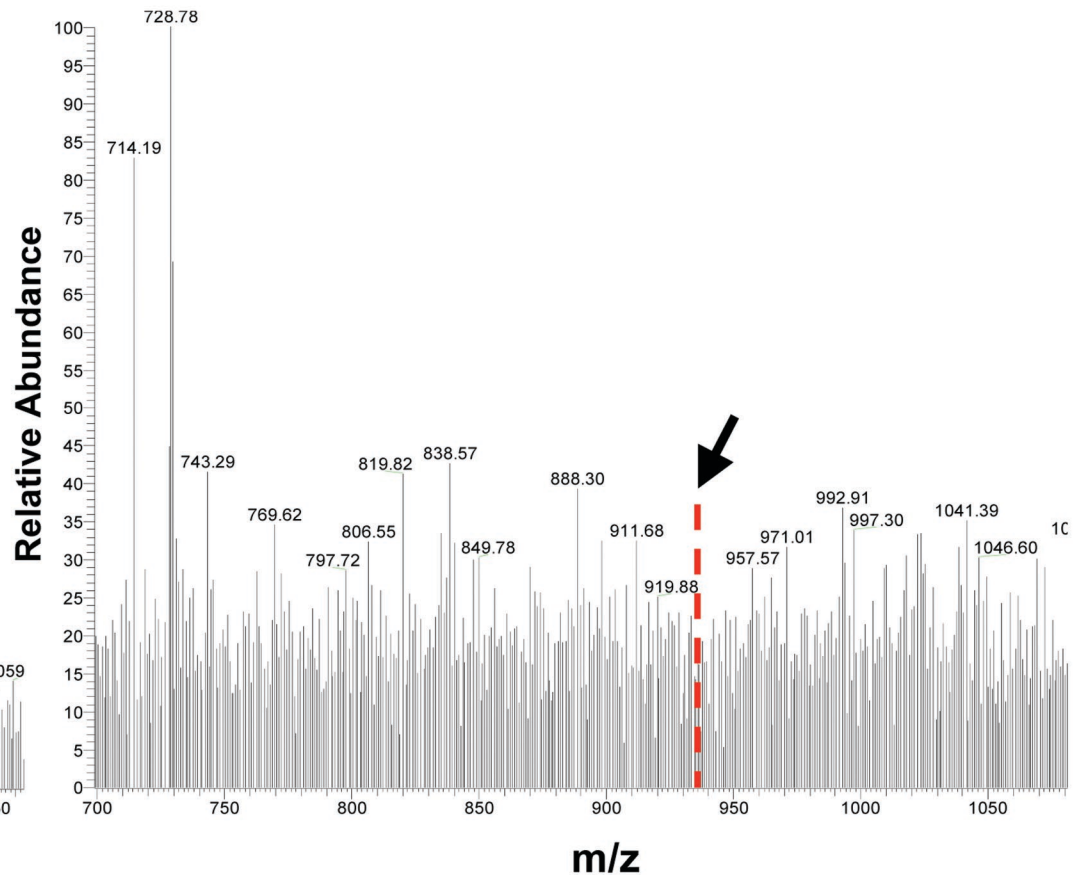

Supplement: NIHMS115377-supplement-4.pdf [file NIHMS115377-supplement-4.pdf]
